# Supplementary material
Source: PubMed Central journal article supplement (PMC6658802)
Supplement: AAC.00573-19-s0001.pdf [file AAC.00573-19-s0001.pdf]

## Supplementary Data

**Table S1.** Primers used for PCR and DNA sequencing in this study

| Primer name                       | Primer sequence (5'-3')  | Target (bp) | Reference |
|-----------------------------------|--------------------------|-------------|-----------|
| <i>bla</i> <sub>CTX-M-1G</sub> -F | F:CTTCCAGAATAAGGAATCCC   | 949         | [1]       |
| <i>bla</i> <sub>CTX-M-1G</sub> -R | R:CGTCTAAGGCGATAAACAAA   |             |           |
| <i>bla</i> <sub>CTX-M-9G</sub> -F | F:TGACCGTATTGGGAGTTTG    | 902         | [1]       |
| <i>bla</i> <sub>CTX-M-9G</sub> -R | R:ACCAGTTACAGCCCTTCG     |             |           |
| <i>fosA3</i> -F                   | F:GCGTCAAGCCTGGCATT      | 282         | [2]       |
| <i>fosA3</i> -R                   | R:GCCGTCAGGGTCGAGAAA     |             |           |
| <i>floR</i> -F                    | F:CTGAGGGTGTCGTCATCTAC   | 673         | [3]       |
| <i>floR</i> -R                    | R:GCTCCGACAATGCTGACTAT   |             |           |
| <i>rmtB</i> -F                    | F:ACATCAACGATGCCCTCAC    | 724         | [4]       |
| <i>rmtB</i> -R                    | R:AAGTTCTGTTCCGATGGTC    |             |           |
| <i>mcr-1</i> -F                   | F:CGGTCAGTCCGTTTGTTTC    | 309         | [5]       |
| <i>mcr-1</i> -R                   | R:CTTGGTCGGTCTGTA GGG    |             |           |
| <i>mcr-2</i> -F                   | F:GCGATGGCGGTCTATCCTGTAT | 378         | [6]       |
| <i>mcr-2</i> -R                   | R:TGCGATGACATGGGGTGTCAGC |             |           |
| <i>mcr-3</i> -F                   | F:TATGGGTTACTATTGCTGG    | 814         | [6]       |

---

|                |                           |      |     |
|----------------|---------------------------|------|-----|
| <i>mcr-3-R</i> | R:CTACCCTGATGCTCATCG      |      |     |
| <i>mcr-4-F</i> | F:GTCATAGTGGTATAAAAGTACAG | 669  | [6] |
| <i>mcr-4-R</i> | R:CCACCGTCTATCAGAGCCAAC   |      |     |
| <i>mcr-5-F</i> | F:GCGGTTGTCTGCATTTATCAC   | 1042 | [6] |
| <i>mcr-5-R</i> | R:CTTTGAAAACCTGTCTTCGGCA  |      |     |
| <i>mcr-6-F</i> | F:GTCCGGTCAATCCCTATCTGT   | 556  | [6] |
| <i>mcr-6-R</i> | R:ATCACGGGATTGACATAGCTAC  |      |     |
| <i>mcr-7-F</i> | F:TGCTCAAGCCCTTCTTTTCGT   | 892  | [6] |
| <i>mcr-7-R</i> | R:TTCATCTGCGCCACCTCGT     |      |     |
| <i>mcr-8-F</i> | F:AACCGCCAGAGCACAGAATT    | 667  | [6] |
| <i>mcr-8-R</i> | R:TTCCCCCAGCGATTCTCCAT    |      |     |

---

**Table S2.** Characterization of NDM-producing isolates

| Isolate                 | Sample type | Market | Date of Isolation | MLST   | NDM gene type | Plasmid replicon type | Size (kb) | Genetic context of <i>bla</i> <sub>NDM</sub> | MIC of imipenem (mg/L) | Other resistance pattern                             | Other resistance genes                                                        |
|-------------------------|-------------|--------|-------------------|--------|---------------|-----------------------|-----------|----------------------------------------------|------------------------|------------------------------------------------------|-------------------------------------------------------------------------------|
| <i>Escherichia coli</i> |             |        |                   |        |               |                       |           |                                              |                        |                                                      |                                                                               |
| HD7C2                   | chicken     | FM3    | 2017/9/23         | ST746  | NDM-5         | IncX3                 | ~50       | Type I                                       | 4                      | AMP, CAZ, CTX, FOX, NEO, FFC, DOX, SXT               | <i>floR</i>                                                                   |
| HP6P012                 | pork        | FM10   | 2016/7/10         | ST48   | NDM-5         | IncX3                 | ~50       | Type I                                       | 2                      | AMP, CAZ, CTX, FOX, DOX, FFC, SXT                    | <i>floR</i>                                                                   |
| HP6P026                 | pork        | FM5    | 2016/7/10         | ST5171 | NDM-5         | IncX3                 | ~50       | Type I                                       | 8                      | AMP, CAZ, CTX, FOX, GEN, NEO, DOX, SXT               |                                                                               |
| HP6P039                 | pork        | FM20   | 2016/7/10         | ST6786 | NDM-5         | IncX3                 | ~50       | Type I                                       | 8                      | AMP, CAZ, CTX, FOX, NEO, FFC, DOX, SXT               | <i>floR</i>                                                                   |
| HP6P040                 | pork        | FM20   | 2016/7/10         | ST7111 | NDM-5         | IncX3                 | ~50       | Type I                                       | 4                      | AMP, CAZ, CTX, FOX, GEN, NEO, DOX, FFC, SXT          | <i>floR</i>                                                                   |
| HP6P055                 | pork        | FM2    | 2016/7/10         | ST7111 | NDM-5         | IncX3                 | ~50       | Type I                                       | 8                      | AMP, CAZ, CTX, FOX, GEN, NEO, DOX, FFC, SXT          | <i>floR</i>                                                                   |
| HZ11                    | pork        | SM2    | 2017/10/2         | ST877  | NDM-5         | IncX3                 | 46.16     | Type I                                       | 1                      | AMP, CAZ, CTX, FOX, NEO, SXT, DOX,                   | <i>bla</i> <sub>CTX-M-55</sub>                                                |
| HZ18                    | chicken     | SM6    | 2017/10/2         | ST93   | NDM-5         | IncX3                 | 46.16     | Type I                                       | 4                      | AMP, CAZ, CTX, FOX, NEO, FFC, DOX, CL, FOS, SXT, CIP | <i>mcr-1</i> , <i>floR</i> ,<br><i>bla</i> <sub>CTX-M-65</sub> , <i>fosA3</i> |
| HZ21                    | pork        | SM2    | 2017/10/2         | ST865  | NDM-5         | IncX3                 | ~50       | Type I                                       | 1                      | AMP, CAZ, CTX, FOX, NEO, FFC, SXT                    |                                                                               |
| HZ6B007                 | beef        | FM23   | 2016/11/11        | ST48   | NDM-5         | IncX3                 | ~50       | Type I                                       | 8                      | AMP, CAZ, CTX, FOX, DOX, FFC, SXT                    | <i>floR</i>                                                                   |
| HZ6P003                 | pork        | FM23   | 2016/7/20         | ST8623 | NDM-5         | IncX3                 | ~50       | Type I                                       | 4                      | AMP, CAZ, CTX, FOX, FFC, NEO, DOX                    | <i>bla</i> <sub>CTX-M-24</sub> , <i>floR</i>                                  |
| HZ6P010                 | pork        | FM24   | 2016/7/20         | ST5229 | NDM-5         | IncX3                 | ~50       | Type I                                       | 4                      | AMP, CAZ, CTX, FOX, GEN, SXT, CIP                    |                                                                               |
| HZ6P018                 | pork        | FM11   | 2016/7/20         | ST48   | NDM-5         | IncX3                 | ~50       | Type I                                       | 8                      | AMP, CAZ, CTX, FOX, NEO, FFC,                        | <i>floR</i>                                                                   |

|         |         |      |            |        |       |       |     |        |    |                                                       |                                                                           |
|---------|---------|------|------------|--------|-------|-------|-----|--------|----|-------------------------------------------------------|---------------------------------------------------------------------------|
|         |         |      |            |        |       |       |     |        |    | DOX, SXT                                              |                                                                           |
| HZ6P033 | pork    | FM23 | 2016/11/11 | ST3489 | NDM-5 | IncX3 | ~50 | Type I | 8  | AMP, CAZ, CTX, FOX, NEO, CL, DOX, SXT, CIP            | <i>mcr-1</i>                                                              |
| HZ7P36  | pork    | FM1  | 2017/9/24  | ST7111 | NDM-5 | IncX3 | ~50 | Type I | 4  | AMP, CAZ, CTX, FOX, DOX, FFC, SXT                     | <i>floR</i>                                                               |
| LW2     | chicken | SM4  | 2017/10/3  | ST10   | NDM-5 | IncX3 | ~50 | Type I | 2  | AMP, CAZ, CTX, FOX, NEO, FOS, DOX, SXT, CIP           | <i>bla<sub>CTX-M-14</sub></i> , <i>fosA3</i>                              |
| LW3     | chicken | SM4  | 2017/10/3  | ST10   | NDM-5 | IncX3 | ~50 | Type I | 2  | AMP, CAZ, CTX, FOX, GEN, NEO, DOX, FFC, FOS, SXT, CIP | <i>bla<sub>CTX-M-65</sub></i> , <i>floR</i> , <i>fosA3</i>                |
| LW6C01  | chicken | FM8  | 2016/7/20  | ST6793 | NDM-5 | IncX3 | ~50 | Type I | 16 | AMP, CAZ, CTX, FOX, FOS, FFC, DOX, SXT, CIP           | <i>bla<sub>CTX-M-65</sub></i> , <i>floR</i> , <i>fosA3</i>                |
| LW6P17  | pork    | FM15 | 2016/7/20  | ST218  | NDM-5 | IncX3 | ~50 | Type I | 8  | AMP, CAZ, CTX, FOX, DOX, FFC, SXT                     | <i>floR</i>                                                               |
| LW7C26  | chicken | FM16 | 2017/9/24  | ST1011 | NDM-5 | IncX3 | ~50 | Type I | 4  | AMP, CAZ, CTX, FOX, NEO, FFC, DOX, CL, FOS, SXT, CIP  | <i>bla<sub>CTX-M-14</sub></i> , <i>mcr-1</i> , <i>floR</i> , <i>fosA3</i> |
| PY7C29  | chicken | FM17 | 2017/9/24  | ST46   | NDM-5 | IncX3 | ~50 | Type I | 4  | AMP, CAZ, CTX, FOX, GEN, NEO, DOX, SXT, CIP           |                                                                           |
| PY7P49  | pork    | FM17 | 2017/9/24  | ST10   | NDM-5 | IncX3 | ~50 | Type I | 8  | AMP, CAZ, CTX, FOX, DOX, FFC, SXT                     | <i>floR</i>                                                               |
| PY7P57  | pork    | FM4  | 2017/9/24  | ST8622 | NDM-5 | IncX3 | ~50 | Type I | 4  | AMP, CAZ, CTX, FOX, GEN, NEO, DOX, FFC, SXT, CIP      | <i>floR</i>                                                               |
| TH6P02  | pork    | FM15 | 2016/7/20  | ST218  | NDM-5 | IncX3 | ~50 | Type I | 4  | AMP, CAZ, CTX, FOX, NEO, SXT, DOX                     |                                                                           |
| TH6P14  | pork    | FM21 | 2016/7/20  | ST218  | NDM-5 | IncX3 | ~50 | Type I | 4  | AMP, CAZ, CTX, FOX, NEO, FFC, DOX, SXT                | <i>floR</i>                                                               |
| TH6P16  | pork    | FM27 | 2016/7/20  | ST7111 | NDM-5 | IncX3 | ~50 | Type I | 4  | AMP, CAZ, CTX, FOX, NEO, FFC, DOX, SXT                | <i>floR</i>                                                               |
| TH7P19  | pork    | SM5  | 2017/9/23  | ST8703 | NDM-5 | IncX3 | ~50 | Type I | 2  | AMP, CAZ, CTX, FOX, DOX                               |                                                                           |
| TH7P22  | pork    | FM27 | 2017/9/23  | ST48   | NDM-5 | IncX3 | ~50 | Type I | 8  | AMP, CAZ, CTX, FOX, DOX, FFC, SXT                     | <i>floR</i>                                                               |

|         |         |      |            |        |       |       |       |        |    |                                                      |                                               |
|---------|---------|------|------------|--------|-------|-------|-------|--------|----|------------------------------------------------------|-----------------------------------------------|
| TH7P24  | pork    | SM7  | 2017/9/23  | ST165  | NDM-5 | IncX3 | ~50   | Type I | 4  | AMP, CAZ, CTX, FOX, DOX, FFC, SXT, CIP               | <i>bla</i> <sub>CTX-M-14</sub> , <i>floR</i>  |
| YX6C03  | chicken | FM18 | 2016/7/8   | ST539  | NDM-5 | IncX3 | ~50   | Type I | 8  | AMP, CAZ, CTX, FOX, CL, SXT, CIP                     | <i>mcr-1</i>                                  |
| YX6C04  | chicken | FM19 | 2016/7/8   | ST48   | NDM-5 | IncX3 | ~50   | Type I | 8  | AMP, CAZ, CTX, FOX, DOX, SXT, FFC, SXT               | <i>floR</i>                                   |
| YX6C15  | chicken | FM13 | 2016/7/8   | ST746  | NDM-5 | IncX3 | ~50   | Type I | 8  | AMP, CAZ, CTX, FOX, NEO, FOS, SXT, CIP               | <i>bla</i> <sub>CTX-M-14</sub> , <i>fosA3</i> |
| YX6C18  | chicken | FM26 | 2016/7/8   | ST2732 | NDM-5 | IncX3 | ~50   | Type I | 4  | AMP, CAZ, CTX, FOX, GEN, FFC, DOX, SXT, CIP          | <i>floR</i>                                   |
| YX6C025 | chicken | FM12 | 2016/11/19 | ST6395 | NDM-5 | IncX3 | ~50   | Type I | 16 | AMP, CAZ, CTX, FOX, NEO, FFC, DOX, SXT, CIP          | <i>bla</i> <sub>CTX-M-55</sub> , <i>floR</i>  |
| YX6C30  | chicken | FM9  | 2016/11/19 | ST3057 | NDM-5 | IncX3 | ~50   | Type I | 4  | AMP, CAZ, CTX, FOX, FFC, SXT, CIP                    | <i>floR</i>                                   |
| YX6P05  | pork    | FM18 | 2016/7/8   | ST3057 | NDM-5 | IncX3 | ~50   | Type I | 4  | AMP, CAZ, CTX, FOX, DOX, FFC, SXT                    | <i>floR</i>                                   |
| YX6P35  | pork    | FM6  | 2016/7/8   | ST1486 | NDM-5 | IncX3 | ~50   | Type I | 8  | AMP, CAZ, CTX, FOX, GEN, NEO, DOX, SXT               |                                               |
| YX6P38  | pork    | FM13 | 2016/7/8   | ST154  | NDM-5 | IncX3 | 46.16 | Type I | 4  | AMP, CAZ, CTX, FOX, DOX, FFC, CL, SXT                | <i>mcr-1</i> , <i>floR</i>                    |
| YX6P40  | pork    | FM25 | 2016/10/15 | ST3057 | NDM-5 | IncX3 | ~50   | Type I | 4  | AMP, CAZ, CTX, FOX, DOX, FFC, SXT                    | <i>floR</i>                                   |
| YX6P44  | pork    | FM14 | 2016/10/15 | ST48   | NDM-5 | IncX3 | 46.16 | Type I | 4  | AMP, CAZ, CTX, FOX, DOX, FFC, SXT                    | <i>floR</i>                                   |
| YX6P58  | pork    | FM22 | 2016/10/15 | ST48   | NDM-5 | IncX3 | 46.16 | Type I | 8  | AMP, CAZ, CTX, FOX, DOX, FFC, SXT                    | <i>floR</i>                                   |
| YX6P67  | pork    | FM22 | 2016/10/15 | ST48   | NDM-5 | IncX3 | 46.16 | Type I | 16 | AMP, CAZ, CTX, FOX, CL                               | <i>mcr-1</i> , <i>bla</i> <sub>CTX-M-65</sub> |
| YX6P69  | pork    | FM12 | 2016/11/19 | ST48   | NDM-5 | IncX3 | ~50   | Type I | 16 | AMP, CAZ, CTX, FOX, GEN, NEO, DOX, FFC, CL, SXT, CIP | <i>mcr-1</i> , <i>floR</i>                    |
| YX6P92  | pork    | FM7  | 2016/11/19 | ST48   | NDM-5 | IncX3 | ~50   | Type I | 4  | AMP, CAZ, CTX, FOX, DOX, CL,                         | <i>mcr-1</i> , <i>bla</i> <sub>CTX-M-65</sub> |

|           |         |      |            |        |       |       |     |        |    |                                                       |                                                    |
|-----------|---------|------|------------|--------|-------|-------|-----|--------|----|-------------------------------------------------------|----------------------------------------------------|
|           |         |      |            |        |       |       |     |        |    | SXT, CIP                                              |                                                    |
| GBY8R01P  | pork    | FM30 | 2018/10/02 | ST5229 | NDM-5 | IncX3 | ~50 | Type I | 4  | AMP, CAZ, CTX, FOX, NEO, FFC, DOX, SXT                | <i>floR</i>                                        |
| GBY8R16P1 | pork    | FM31 | 2018/10/02 | New ST | NDM-5 | IncX3 | ~50 | Type I | 4  | AMP, CAZ, CTX, FOX, AMI, GEN, DOX, FFC, SXT           | <i>floR, rmtB</i>                                  |
| GHZ8R03P1 | pork    | FM33 | 2018/10/20 | ST617  | NDM-5 | IncX3 | ~50 | Type I | 8  | AMP, CAZ, CTX, FOX, NEO, FFC, DOX, SXT, CIP           | <i>floR</i>                                        |
| GHZ8R05P  | pork    | FM33 | 2018/10/20 | ST641  | NDM-5 | IncX3 | ~50 | Type I | 4  | AMP, CAZ, CTX, FOX, GEN, NEO, DOX, FFC, SXT           | <i>floR</i>                                        |
| GHZ8R06P  | pork    | FM33 | 2018/10/20 | ST641  | NDM-5 | IncX3 | ~50 | Type I | 4  | AMP, CAZ, CTX, FOX, GEN, NEO, DOX, FFC                | <i>floR</i>                                        |
| GHZ8R18-P | pork    | FM34 | 2018/10/20 | ST767  | NDM-5 | IncX3 | ~50 | Type I | 8  | AMP, CAZ, CTX, FOX, NEO, FFC, DOX, SXT                | <i>floR</i>                                        |
| GHZ8R35-P | pork    | SM9  | 2018/10/20 | ST10   | NDM-5 | IncX3 | ~50 | Type I | 8  | AMP, CAZ, CTX, FOX, DOX, FFC                          | <i>floR</i>                                        |
| GHZ8R52-P | pork    | SM10 | 2018/10/20 | ST195  | NDM-5 | IncX3 | ~50 | Type I | 8  | AMP, CAZ, CTX, FOX, FFC                               | <i>floR</i>                                        |
| GTH8R06-R | pork    | FM15 | 2018/9/21  | ST10   | NDM-5 | IncX3 | ~50 | Type I | 4  | AMP, CAZ, CTX, FOX, GEN, NEO, DOX, FFC, FOS, SXT, CIP | <i>floR, fosA3</i>                                 |
| GTH8R12-P | chicken | FM27 | 2018/9/21  | ST167  | NDM-5 | IncX3 | ~50 | Type I | 32 | AMP, CAZ, CTX, FOX, NEO, FFC, DOX, SXT, CIP           | <i>floR, bla<sub>CTX-M-55</sub></i>                |
| GTH8R18R1 | chicken | SM14 | 2018/9/21  | ST48   | NDM-5 | IncX3 | ~50 | Type I | 2  | AMP, CAZ, CTX, FOX, NEO, FFC, DOX, SXT, CIP           | <i>floR, bla<sub>CTX-M-65</sub></i>                |
| GTH8R18R3 | chicken | SM14 | 2018/9/21  | ST48   | NDM-1 | IncX3 | ~50 | Type I | 16 | AMP, CAZ, CTX, FOX, NEO, FFC, SXT                     | <i>floR, bla<sub>CTX-M-65</sub></i>                |
| GTH8R21-R | chicken | FM15 | 2018/9/21  | ST117  | NDM-5 | IncX3 | ~50 | Type I | 4  | AMP, CAZ, CTX, FOX, DOX, FFC, SXT                     | <i>floR, bla<sub>CTX-M-14</sub></i>                |
| GTH8R24-P | chicken | FM36 | 2018/9/21  | ST93   | NDM-7 | IncX3 | ~50 | Type I | 4  | AMP, CAZ, CTX, FOX, FFC, FOS, SXT, CIP                | <i>floR, fosA3</i>                                 |
| GTH8R25B2 | chicken | SM15 | 2018/9/21  | ST10   | NDM-5 | IncX3 | ~50 | Type I | 16 | AMP, CAZ, CTX, FOX, NEO, FFC, DOX, CL, FOS, SXT, CIP  | <i>bla<sub>CTX-M-14</sub>, mcr-1, fosA3, floR,</i> |

|           |         |      |            |        |       |       |     |          |    |                                                  |                                                                            |
|-----------|---------|------|------------|--------|-------|-------|-----|----------|----|--------------------------------------------------|----------------------------------------------------------------------------|
| GTH8R35P1 | pork    | FM15 | 2018/9/21  | ST744  | NDM-5 | IncX3 | ~50 | Type I   | 16 | AMP, CAZ, CTX, FOX, DOX, FFC, SXT                | <i>floR</i>                                                                |
| GTH8R36-B | pork    | FM15 | 2018/9/21  | ST101  | NDM-5 | IncX3 | ~50 | Type I   | 1  | AMP, CAZ, CTX, FOX, NEO, FFC, DOX, SXT           | <i>floR</i>                                                                |
| GYX8R10-P | pork    | FM19 | 2018/10/13 | ST617  | NDM-5 | IncX3 | ~50 | Type I   | 4  | AMP, CAZ, CTX, FOX, GEN, NEO, DOX, FFC, SXT, CIP | <i>floR</i>                                                                |
| GYX8R26-P | chicken | FM38 | 2018/10/13 | ST101  | NDM-5 | IncX3 | ~50 | Type I   | 8  | AMP, CAZ, CTX, FOX, NEO, FFC, DOX, SXT, CIP      | <i>floR</i>                                                                |
| GYX8R30-P | chicken | SM17 | 2018/10/13 | New ST | NDM-5 | IncX3 | ~50 | Type I   | 16 | AMP, CAZ, CTX, FOX, NEO, FFC, DOX, CL, FOS       | <i>bla</i> <sub>CTX-M-65</sub> , <i>mcr-1</i> , <i>floR</i> , <i>fosA3</i> |
| GYX8R37-Y | chicken | FM39 | 2018/10/13 | ST2456 | NDM-5 | IncX3 | ~50 | Type I   | 4  | AMP, CAZ, CTX, FOX, GEN, NEO, FFC, DOX, SXT      | <i>floR</i>                                                                |
| GHZ8R04P1 | pork    | FM33 | 2018/10/20 | ST5229 | NDM-5 | IncX3 | ~50 | Type II  | 2  | AMP, CAZ, CTX, FOX, GEN, NEO, DOX, FFC, SXT, CIP | <i>floR</i>                                                                |
| GHZ8R09-P | chicken | FM33 | 2018/10/20 | ST48   | NDM-5 | IncX3 | ~50 | Type II  | 8  | AMP, CAZ, CTX, FOX, FFC, SXT                     | <i>floR</i>                                                                |
| GTH8R19-P | chicken | FM15 | 2018/9/21  | ST1252 | NDM-5 | IncX3 | ~50 | Type II  | 4  | AMP, CAZ, CTX, FOX, GEN, NEO, DOX, FFC, SXT      | <i>floR</i>                                                                |
| GYX8R04-P | chicken | FM6  | 2018/10/13 | ST6725 | NDM-5 | IncX3 | ~50 | Type II  | 4  | AMP, CAZ, CTX, FOX, DOX, FFC, SXT, CIP           | <i>floR</i>                                                                |
| GYX8R13-B | chicken | FM19 | 2018/10/13 | ST1204 | NDM-5 | IncX3 | ~50 | Type II  | 8  | AMP, CAZ, CTX, FOX, DOX, FFC, SXT                | <i>floR</i>                                                                |
| CS23P     | chicken | SM12 | 2018/10/26 | ST7593 | NDM-5 | IncX3 | ~50 | Type IV  | 2  | AMP, CAZ, CTX, FOX, GEN, NEO, DOX, FFC, SXT, CIP | <i>floR</i>                                                                |
| CS25P     | pork    | SM13 | 2018/10/26 | ST7593 | NDM-5 | IncX3 | ~50 | Type IV  | 2  | AMP, CAZ, CTX, FOX, GEN, NEO, DOX, FFC, SXT, CIP | <i>floR</i>                                                                |
| GYX8R02P2 | pork    | FM6  | 2018/10/13 | ST10   | NDM-5 | IncX3 | ~50 | Type VI  | 4  | AMP, CAZ, CTX, FOX, DOX, FFC, SXT                | <i>floR</i>                                                                |
| GYX8R05-P | chicken | FM6  | 2018/10/13 | ST4015 | NDM-5 | IncX3 | ~50 | Type VII | 4  | AMP, CAZ, CTX, FOX, GEN, FFC, DOX, SXT           | <i>floR</i>                                                                |
| GBY8R32P  | pork    | FM32 | 2018/10/02 | ST942  | NDM-5 | IncX3 | ~50 | ND       | 16 | AMP, CAZ, CTX, FOX, DOX, FFC,                    | <i>floR</i>                                                                |

|           |         |      |            |        |       |          |             |        |    | SXT                                                        |                                                                          |
|-----------|---------|------|------------|--------|-------|----------|-------------|--------|----|------------------------------------------------------------|--------------------------------------------------------------------------|
| HP6P038   | pork    | FM20 | 2016/7/10  | ST117  | NDM-5 | F2:A-:B- | ~80         | Type I | 4  | AMP, CAZ, CTX, FOX, GEN, NEO, DOX, FFC, SXT                | <i>floR</i>                                                              |
| YX45      | chicken | SM3  | 2017/10/3  | ST1114 | NDM-1 | ND       | ~128        | ND     | 2  | AMP, CAZ, CTX, FOX, AMI, GEN, NEO, DOX, FFC, FOS, SXT, CIP | <i>bla<sub>CTX-M-65</sub></i> , <i>floR</i> , <i>fosA3</i> , <i>rmtB</i> |
| GBY8R18R1 | chicken | FM31 | 2018/10/02 | ST2165 | NDM-5 | ND       | ~270        | ND     | 8  | AMP, CAZ, CTX, FOX, NEO, FFC, DOX, SXT                     | <i>floR</i>                                                              |
| GHZ8R13-B | pork    | SM8  | 2018/10/20 | ST10   | NDM-5 | ND       | ~60         | ND     | 4  | AMP, CAZ, CTX, FOX, NEO, FFC, DOX, SXT                     | <i>floR</i>                                                              |
| GHZ8R49-P | chicken | FM35 | 2018/10/20 | ST683  | NDM-5 | ND       | ~240        | ND     | 4  | AMP, CAZ, CTX, FOX, NEO, FFC, DOX, SXT                     | <i>floR</i>                                                              |
| GHZ8R51P2 | chicken | FM35 | 2018/10/20 | ST7154 | NDM-5 | ND       | ~260        | ND     | 16 | AMP, CAZ, CTX, FOX, NEO, FFC, DOX, SXT                     | <i>floR</i>                                                              |
| GHZ8R63P2 | pork    | SM11 | 2018/10/20 | ST641  | NDM-5 | ND       | ~150        | ND     | 1  | AMP, CAZ, CTX, FOX, DOX, SXT, CIP                          |                                                                          |
| GHZ8R64-P | pork    | SM11 | 2018/10/20 | ST10   | NDM-5 | ND       | ~90         | ND     | 2  | AMP, CAZ, CTX, FOX, NEO, FFC, DOX, CIP                     | <i>floR</i>                                                              |
| CS30P     | chicken | SM13 | 2018/10/26 | ST115  | NDM-5 | ND       | ~110        | ND     | 2  | AMP, CAZ, CTX, FOX, FFC, CL, SXT, CIP                      | <i>mcr-1</i> , <i>floR</i>                                               |
| GTH8R05-P | pork    | SM14 | 2018/9/21  | ST2732 | NDM-5 | ND       | ~110        | ND     | 2  | AMP, CAZ, CTX, FOX, AMI, GEN, NEO, DOX, FFC, FOS, SXT, CIP | <i>floR</i> , <i>bla<sub>CTX-M-55</sub></i> , <i>fosA3</i>               |
| GTH8R14-P | chicken | FM27 | 2018/9/21  | ST165  | NDM-5 | ND       | ~260        | ND     | 2  | AMP, CAZ, CTX, FOX, NEO, FFC, DOX, SXT, CIP                | <i>floR</i>                                                              |
| GTH8R18Y1 | chicken | SM14 | 2018/9/21  | ST410  | NDM-5 | ND       | ~105        | ND     | 16 | AMP, CAZ, CTX, FOX, NEO, FOS, SXT, CIP                     | <i>fosA3</i>                                                             |
| GTH8R39-P | pork    | FM37 | 2018/9/21  | ST10   | NDM-5 | ND       | ~70,<br>~50 | ND     | 4  | AMP, CAZ, CTX, FOX, NEO, FFC, DOX, SXT                     | <i>floR</i>                                                              |
| GYX8R09-P | pork    | FM19 | 2018/10/13 | ST10   | NDM-5 | ND       | ~90         | ND     | 16 | AMP, CAZ, CTX, FOX, DOX, FFC, SXT                          | <i>floR</i>                                                              |
| GYX8R12-P | chicken | FM19 | 2018/10/13 | ST4937 | NDM-5 | ND       | ~100        | ND     | 2  | AMP, CAZ, CTX, FOX, DOX, FFC, SXT                          | <i>floR</i>                                                              |



|                              |         |      |            |        |       |            |       |          |    |                                                           |                                              |
|------------------------------|---------|------|------------|--------|-------|------------|-------|----------|----|-----------------------------------------------------------|----------------------------------------------|
|                              |         |      |            |        |       |            |       |          |    | SXT, CIP                                                  |                                              |
| GYX8R20-P                    | pork    | SM16 | 2018/10/13 | ST746  | NDM-5 | ND         | ~90   | ND       | 4  | AMP, CAZ, CTX, FOX, AMI, GEN, NEO, DOX, FFC, SXT          | <i>floR</i> , <i>rmtB</i>                    |
| GYX8R39-P                    | chicken | FM39 | 2018/10/13 | ST1844 | NDM-5 | ND         | ~280  | ND       | 8  | AMP, CAZ, CTX, FOX, NEO, FFC, DOX, SXT                    | <i>floR</i>                                  |
| GHZ8R08P1                    | chicken | FM33 | 2018/10/20 | ST8758 | NDM-5 | Chromosome | NA    | ND       | 4  | AMP, CAZ, CTX, FOX, NEO, FFC, DOX, SXT                    | <i>floR</i> , <i>bla</i> <sub>CTX-M-65</sub> |
| GTH8R01-R                    | pork    | FM27 | 2018/9/21  | ST10   | NDM-5 | ND         | ND    | ND       | 16 | AMP, CAZ, CTX, FOX, DOX, FFC, SXT                         | <i>floR</i>                                  |
| <i>Klebsiella pneumoniae</i> |         |      |            |        |       |            |       |          |    |                                                           |                                              |
| HZ6B005                      | beef    | FM23 | 2016/11/11 | ST1    | NDM-5 | IncX3      | 46.16 | Type I   | 8  | AMP, CAZ, CTX, FOX, NEO, FFC, DOX                         | <i>floR</i>                                  |
| YX6B006                      | beef    | FM26 | 2016/7/8   | ST35   | NDM-5 | IncX3      | ~50   | Type I   | 16 | AMP, CAZ, CTX, FOX, GEN, NEO, DOX, FFC, SXT               | <i>floR</i>                                  |
| YX6P029                      | pork    | FM28 | 2016/7/8   | ST327  | NDM-5 | IncX3      | ~50   | Type I   | 8  | AMP, CAZ, CTX, FOX, GEN, NEO, DOX, FFC, CL, SXT           | <i>mcr-1</i> , <i>floR</i>                   |
| HZ6P005                      | pork    | FM23 | 2016/7/20  | ST1    | NDM-5 | IncX3      | ~50   | Type I   | 2  | AMP, CAZ, CTX, FOX, GEN, NEO, DOX, FFC, CL, FOS, SXT, CIP | <i>mcr-1</i> , <i>floR</i>                   |
| GYX8R15-B                    | pork    | FM40 | 2018/10/13 | ST25   | NDM-5 | IncX3      | ~50   | Type I   | 16 | AMP, CAZ, CTX, FOX, GEN, FFC, DOX, CL, SXT, CIP           | <i>mcr-1</i> , <i>floR</i>                   |
| GYX8R26-B                    | chicken | FM38 | 2018/10/13 | ST11   | NDM-5 | IncX3      | ~50   | Type II  | 16 | AMP, CAZ, CTX, FOX, DOX, FFC, FOS, SXT, CIP, TGC          | <i>floR</i>                                  |
| GHZ8R6-B                     | pork    | FM33 | 2018/10/20 | ST45   | NDM-1 | IncX3      | ~60   | Type III | 1  | AMP, CAZ, CTX, FOX, GEN, NEO, DOX, FFC, SXT               | <i>floR</i>                                  |
| GHZ8R16B1                    | pork    | FM34 | 2018/10/20 | ST3484 | NDM-1 | IncX3      | ~50   | Type III | 1  | AMP, CAZ, CTX, FOX, GEN, NEO, DOX, FFC, SXT, CIP          | <i>floR</i>                                  |
| GHZ8R28B                     | pork    | SM18 | 2018/10/20 | ST1040 | NDM-1 | IncX3      | ~50   | Type III | 4  | AMP, CAZ, CTX, FOX, NEO, SXT, DOX                         | <i>floR</i>                                  |
| HZ6P004                      | pork    | FM23 | 2016/7/20  | ST1    | NDM-5 | IncX3      | 47.8  | Type V   | 4  | AMP, CAZ, CTX, FOX, GEN, NEO, DOX, FFC, CL, SXT, CIP      | <i>mcr-1</i> , <i>floR</i>                   |

| <i>Enterobacter aerogenes</i> |         |      |            |    |       |            |            |          |    |                                                 |                            |
|-------------------------------|---------|------|------------|----|-------|------------|------------|----------|----|-------------------------------------------------|----------------------------|
| HZ6P014                       | pork    | FM29 | 2016/7/20  | ND | NDM-1 | IncX3      | ~50        | Type III | 32 | AMP, CAZ, CTX, FOX, DOX, FFC, SXT               | <i>floR</i>                |
| CS26P                         | pork    | SM13 | 2018/10/26 | ND | NDM-1 | IncX3      | ~50        | Type III | 4  | AMP, CAZ, CTX, FOX, DOX, FFC, CL, SXT           | <i>floR</i>                |
| <i>Proteus mirabilis</i>      |         |      |            |    |       |            |            |          |    |                                                 |                            |
| GTH8R04Y1                     | Pork    | SM14 | 2018/9/21  | ND | NDM-1 | chromosome | NA         | ND       | 16 | AMP, CAZ, CTX, FOX, NEO, FFC, DOX, CL, CIP      | <i>floR</i>                |
| CS27Y                         | chicken | SM13 | 2018/10/26 | ND | NDM-1 | ND         | ~140       | ND       | 16 | AMP, CAZ, CTX, FOX, DOX, FFC, CL,               | <i>mcr-1</i> , <i>floR</i> |
| CS28P                         | chicken | SM13 | 2018/10/26 | ND | NDM-1 | ND         | ~130, ~190 | ND       | 16 | AMP, CAZ, CTX, FOX, NEO, FFC, DOX, CL           | <i>floR</i>                |
| GTH8R18Y2                     | chicken | SM14 | 2018/9/21  | ND | NDM-1 | ND         | ND         | ND       | 16 | AMP, CAZ, CTX, FOX, NEO, FFC, DOX, CL, FOS, CIP | <i>floR</i> , <i>fosA3</i> |

Abbreviations: FM, farmers market; SM, supermarket; AMP, ampicillin; CAZ, ceftazidine; CTX, cefotaxime; FOX, ceftazidime; AMI, amikacin; GEN, gentamycin; NEO, neomycin; DOX, doxycycline; FFC, florfenicol; CL, Colistin; IMP, imipenem; FOS, fosfomicin; SXT, sulfamethoxazole/trimethoprim; CIP, ciprofloxacin; TGC, tigecycline; ND, not determined; NA: not applicable.

**Table S3.** Primers used for determining genetic environment of *bla*<sub>NDM</sub>

| Primer name | Primer sequence (5'-3')   | Target (bp) | Reference  |
|-------------|---------------------------|-------------|------------|
| umuD-F      | F: ATGCGATTGCGACTACAC     | 1460        | This study |
| tat-R       | R: TGGTACTTCACGGTCAGG     |             |            |
| bleo-F      | F: TGGGTCGAGGTCAGGATAGG   | 1070        | [7]        |
| ISAbal25-R  | R: GCTTTTGAAACTGTTCGCACCT |             |            |
| NDM-F       | F: GGTTGATCTCCTGCTTGAT    | Variable    | This study |
| IS5-R       | R: GCGATTGATGGTCTTGAAC    |             |            |
| IS5-F       | F: TGAGTCAGCCGAGAAGAA     | Variable    | This study |
| IS3000-R    | R: CCAAGGAGATACCAAGAGAAT  |             |            |
| Tn2-F       | F: AGTGCTGGTCCGTTTCATT    | Variable    | This study |
| HP-R        | R: GCTGGTTATCTGTGCTCTG    |             |            |
| NDM-F       | F:GCGTAGTGCTCAGTGTCG      | Variable    | This study |
| HP-R        | R:CGTCCTTATGTTGTTGGGT     |             |            |

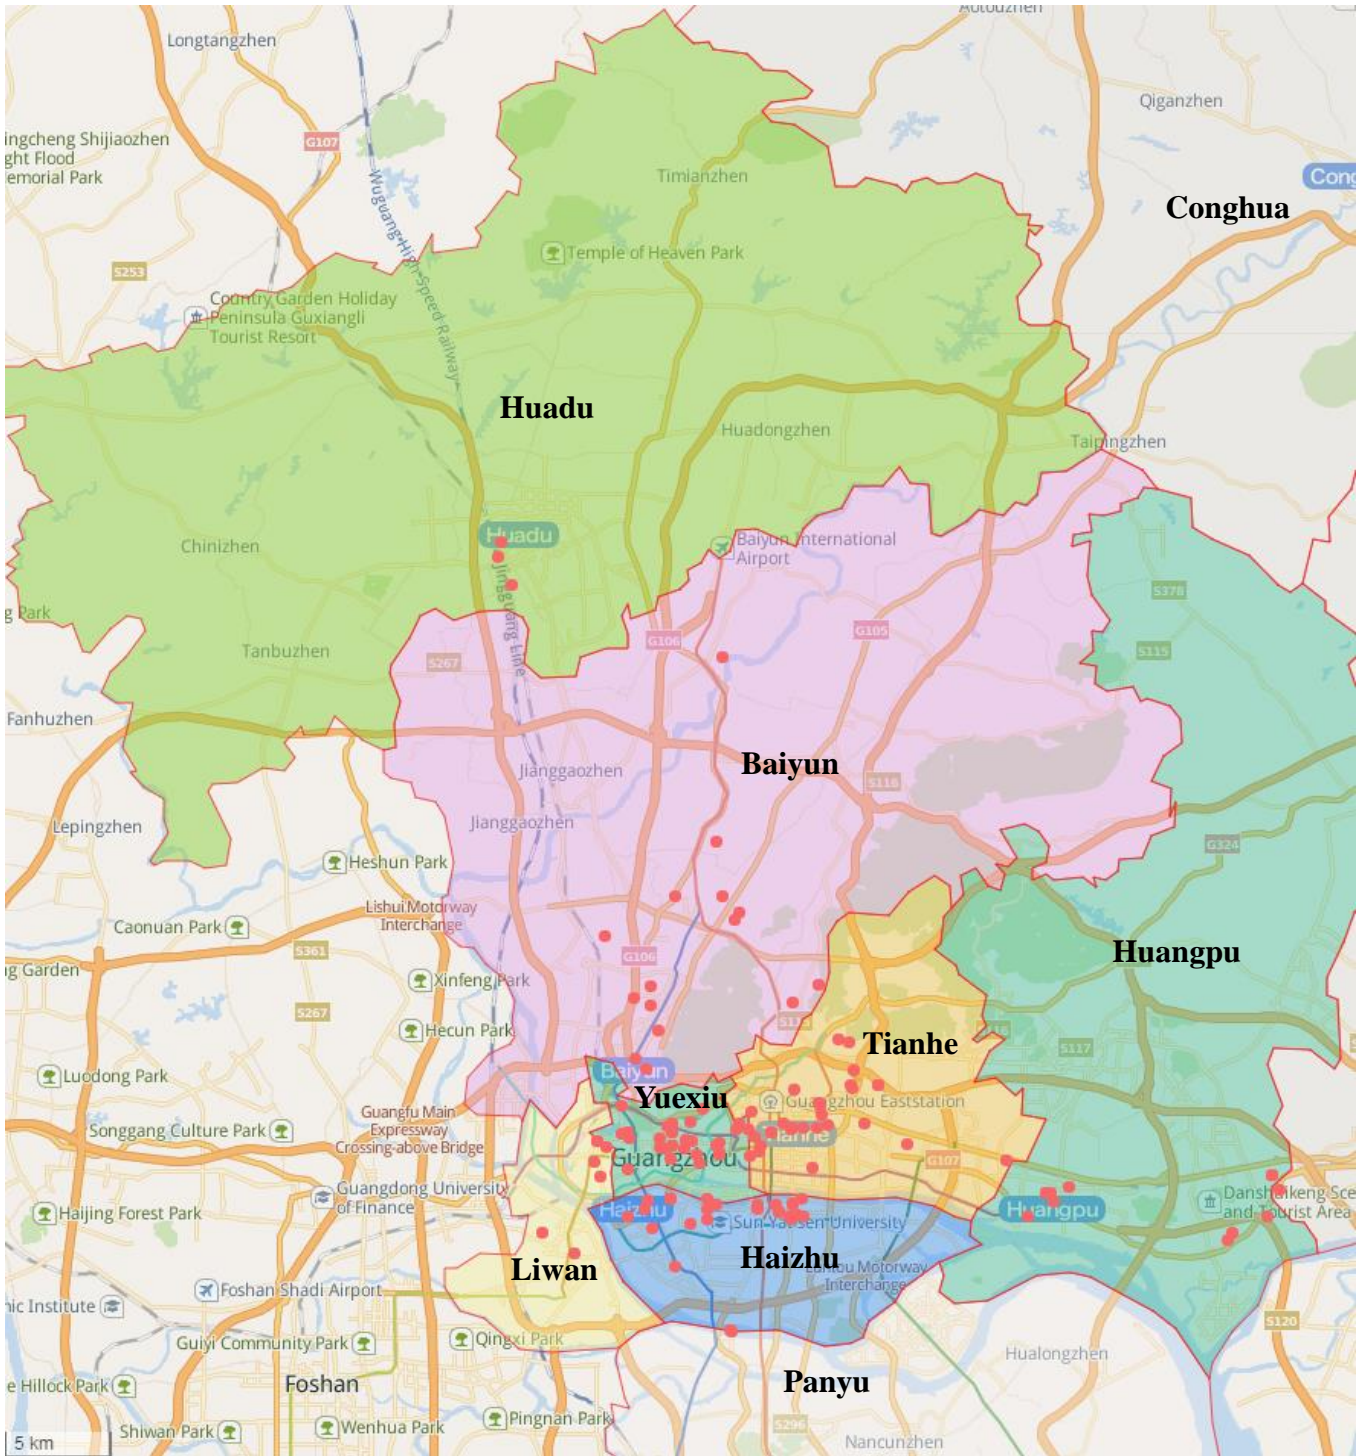

**Figure S1.** Distribution of sampling sites.

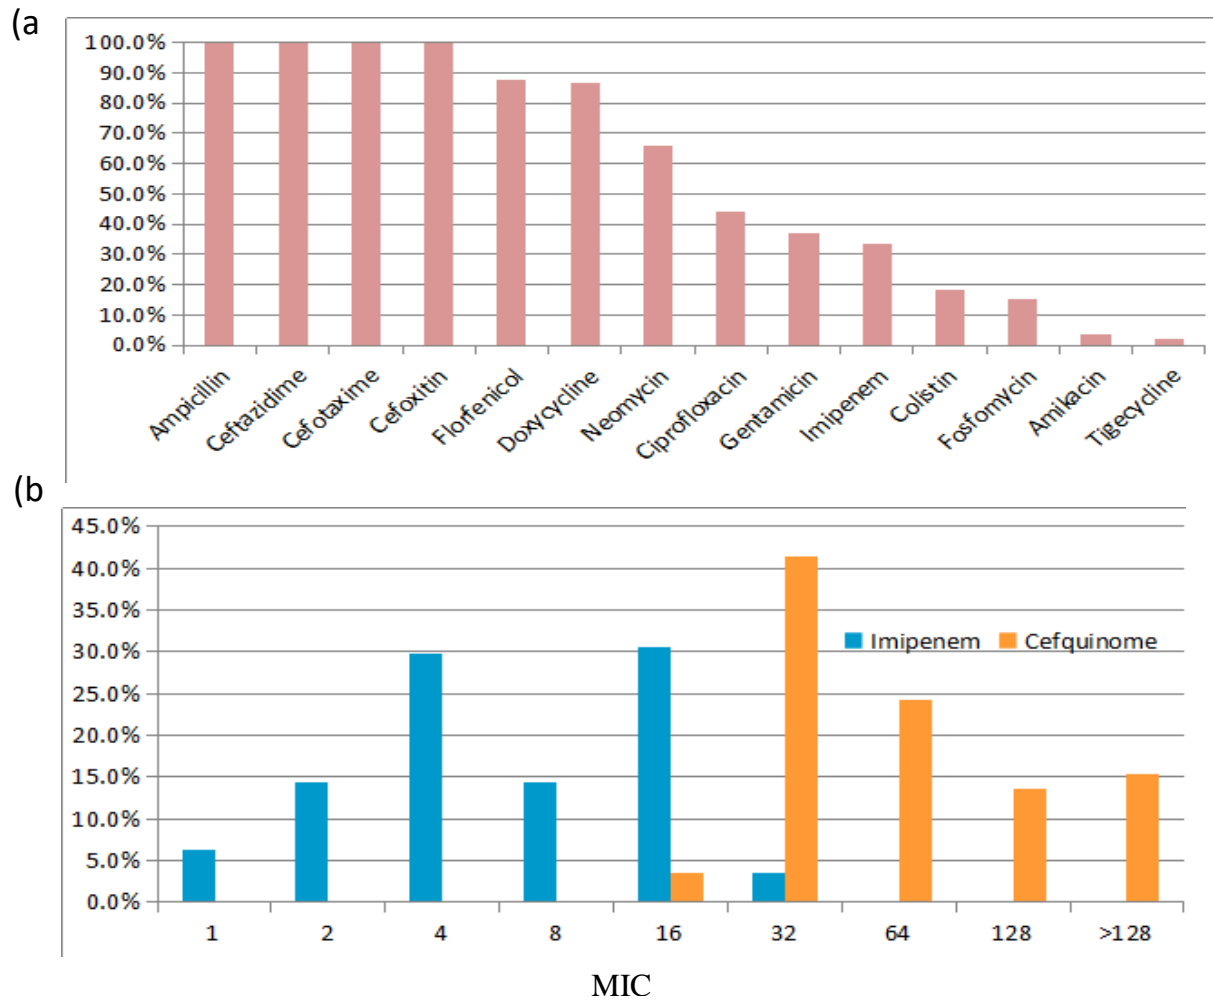

**Figure S2.** Antimicrobial susceptibility of NDM-producing *Enterobacteriaceae* isolated from retail meat samples. (a) Antimicrobial resistance of NDM-producing *Enterobacteriaceae* isolates. (b) Imipenem and cefquinome MIC distribution among NDM-producing *Enterobacteriaceae* isolates.

PFGE Method:

Pulsed-field gel electrophoresis (PFGE) typing was performed by an XbaI macrorestriction analysis according to the PulseNet (<http://www.pulsenetinternational.org/protocols/>) using Bio-Rad CHEF Mapper® System (Bio-Rad Laboratories, Hercules, CA, USA). PFGE patterns were analyzed using BioNumerics v.7.1 (Applied Maths, Sint-Martens-Latem, Belgium) and interpreted accordingly (8).

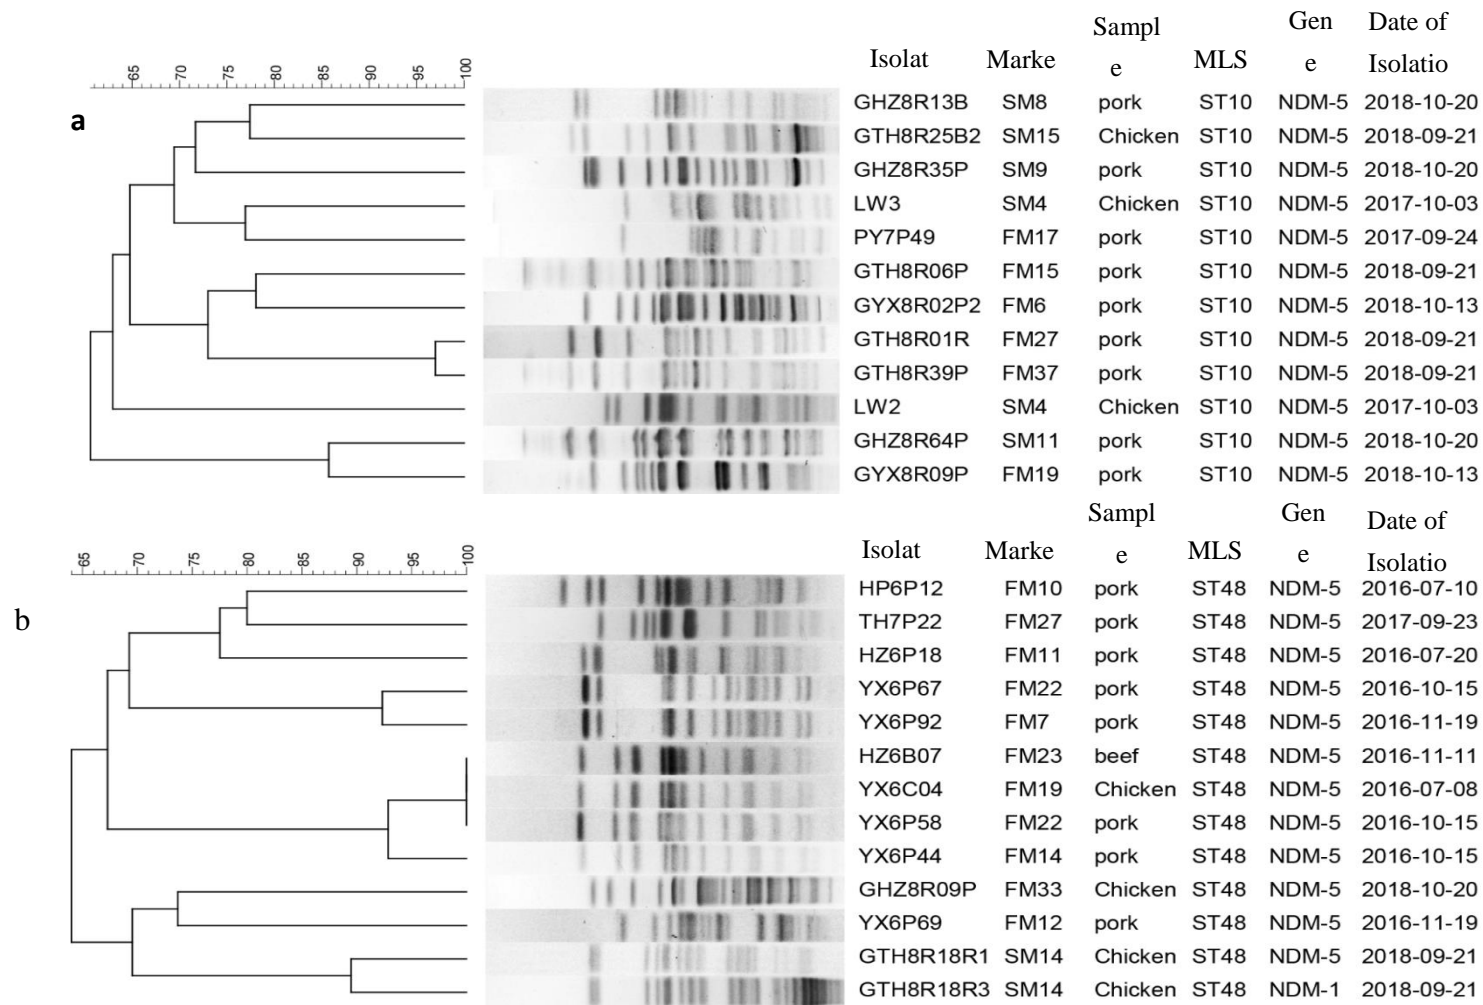

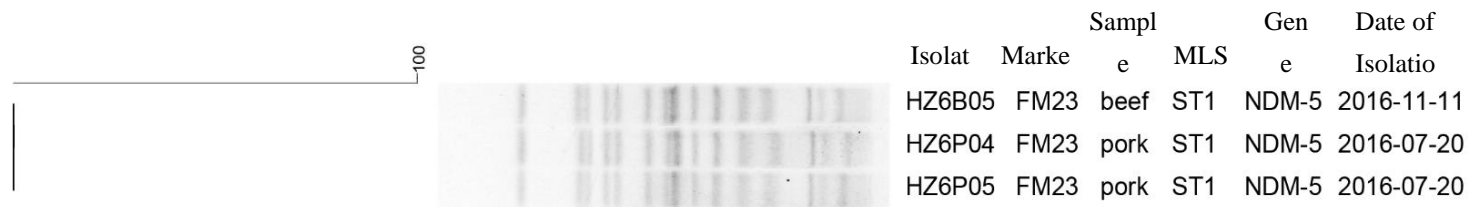

**Figure S3.** PFGE analysis of NDM-producing *Enterobacteriaceae* isolates. (a) *E. coli* ST10 strains. (b) *E. coli* ST48 strains. (c) *K. pneumoniae* ST1 strains.

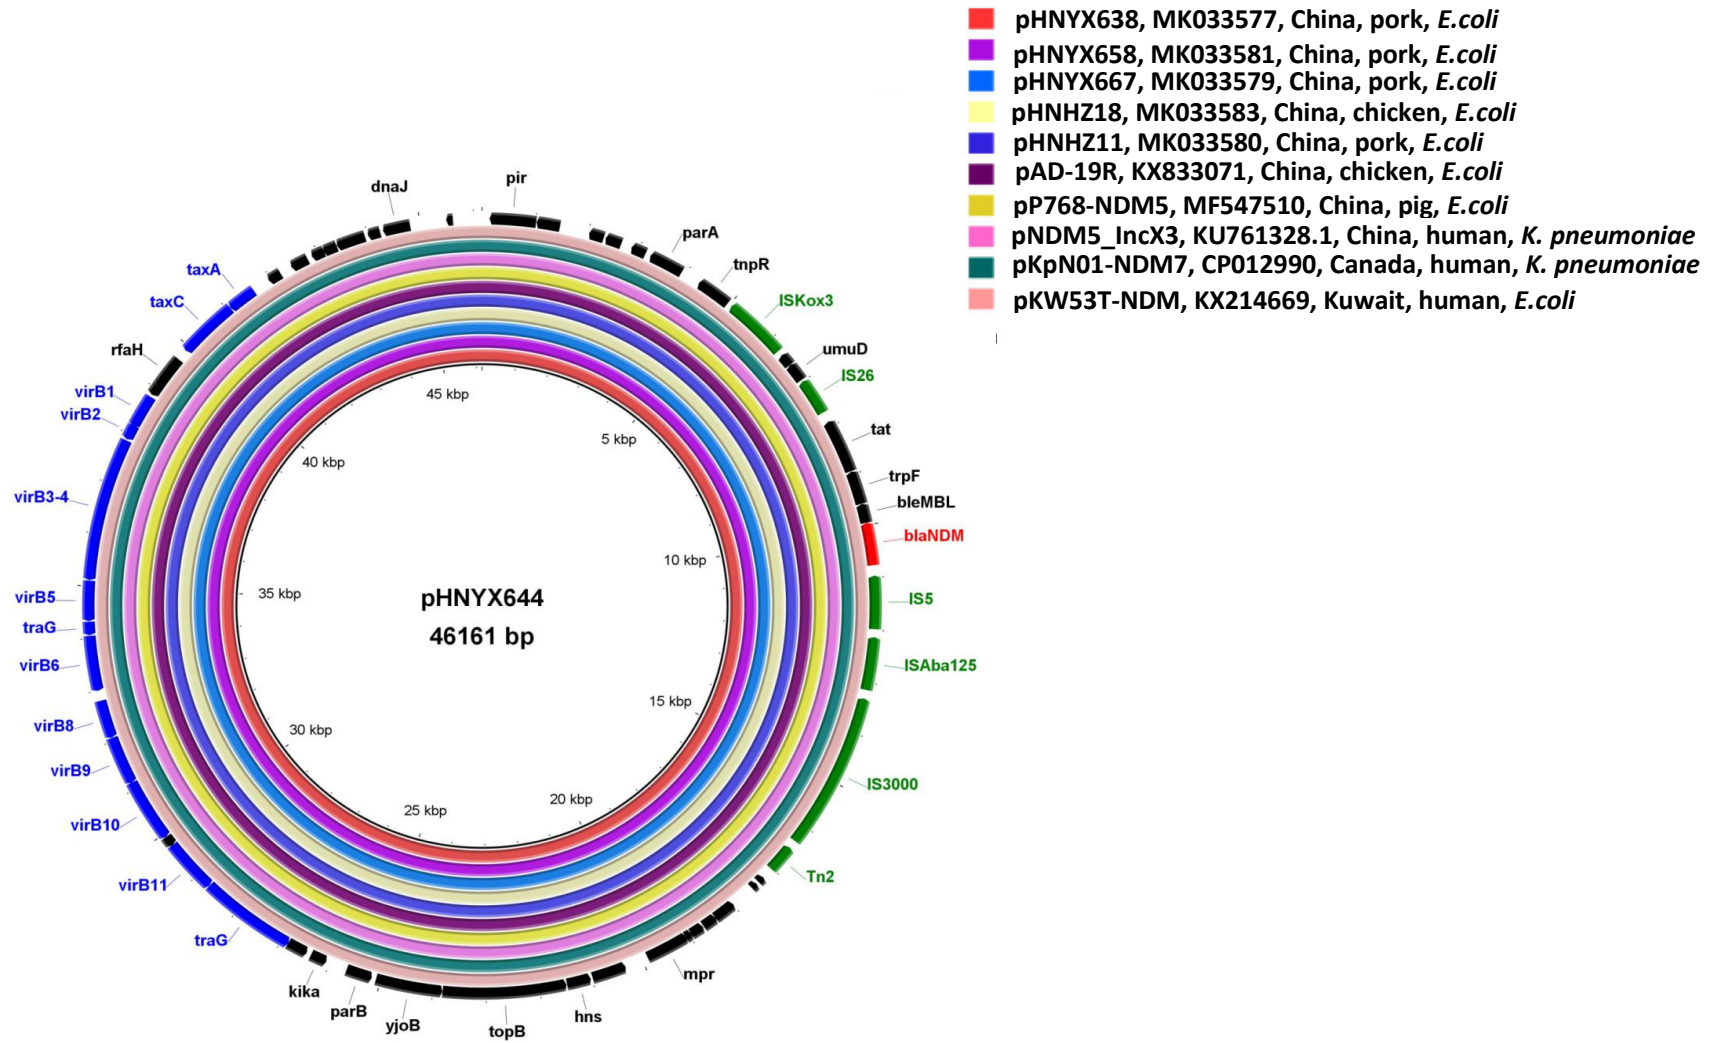

**Figure S4.** The sequence comparison of IncX3 plasmids carrying *bla*<sub>NDM</sub> of different sources.



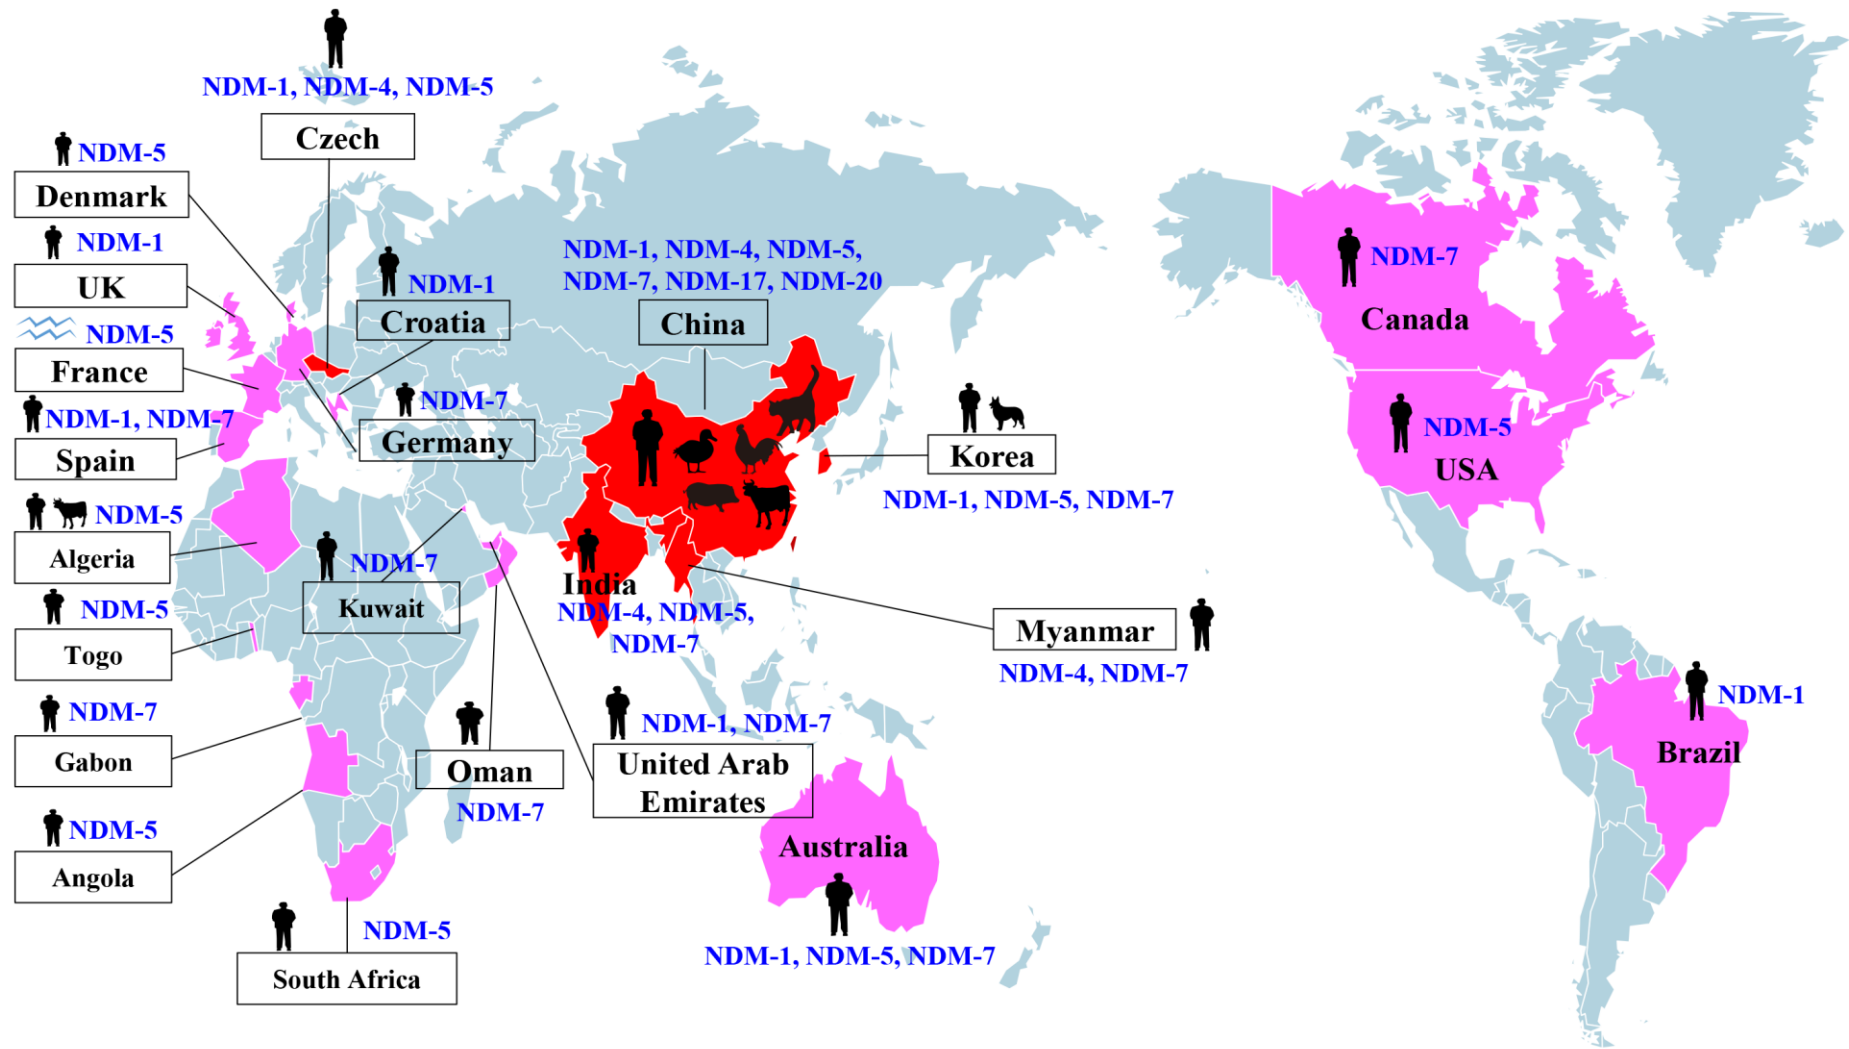

Figure S5. Global distribution of *bla*<sub>NDM</sub>-carrying IncX3 plasmid in *Enterobacteriaceae*.

## References:

1. Liu JH, Wei SY, Ma JY, Zeng ZL, LüDH, Yang GX, Chen ZL. 2007. Detection and characterization of CTX-M and CMY-2  $\beta$ -lactamases among *Escherichia coli* isolates from farm animals in Guangzhou Province of China. *Int. J Antimicrob Agents* 29:576-581. <https://doi.org/10.1016/j.ijantimicag.2006.12.015>.
2. Hou J, Huang X, Deng Y, He L, Yang T, Zeng Z, Chen Z, Liu JH. 2012. Dissemination of the fosfomycin resistance gene *fosA3* with CTX-M  $\beta$ -lactamase genes and *rmtB* carried on IncFII plasmids among *Escherichia coli* isolates from pets in China. *Antimicrob Agents Chemother* 56:2135-2138. <https://doi.org/10.1128/AAC.05104-11>.
3. Chen S, Zhao S, White DG, Schroeder CM, Lu R, Yang H, McDermott PF, Ayers S, Meng J. 2004. Characterization of multiple-antimicrobial-resistant *Salmonella* serovars isolated from retail meats. *Appl Environm Microbiol* 70:1-7. <https://doi.org/10.1128/AEM.70.1.1-7.2004>.
4. Chen L, Chen ZL, Liu JH, Zeng ZL, Ma JY, Jiang HX. 2007. Emergence of *RmtB* methylase-producing *Escherichia coli* and *Enterobacter cloacae* isolates from pigs in China. *J Antimicrob Chemother* 59:880-885. <https://doi.org/10.1093/jac/dkm065>.
5. Liu YY, Wang Y, Walsh TR, Yi LX, Zhang R, Spencer J, Doi Y, Tian G, Dong B, Huang X, Yu LF, Gu D, Ren H, Chen X, Lv L, He D, Zhou H, Liang Z, Liu JH, Shen J. 2016. Emergence of plasmid-mediated colistin resistance mechanism MCR-1 in animals and human beings in China: a microbiological and molecular biological study. *Lancet Infect Dis* 16:161-168. [https://doi.org/10.1016/S1473-3099\(15\)00424-7](https://doi.org/10.1016/S1473-3099(15)00424-7).
6. Wang X, Wang Y, Zhou Y, Li J, Yin W, Wang S, Zhang S, Shen J, Shen Z, Wang Y. 2018. Emergence of a novel mobile colistin resistance gene, *mcr-8*, in

NDM-producing *Klebsiella pneumoniae*. *Emerg Microbes Infect* 7:122. <https://doi.org/10.1038/s41426-018-0124-z>

7. Campos JC, da Silva MJ, dos Santos PR, Barros EM, Pereira Mde O, Seco BM, Magagnin CM, Leiroz LK, de Oliveira TG, de Faria-Júnior C, Cerdeira LT, Barth AL, Sampaio SC, Zavascki AP, Poirel L, Sampaio JL. 2015. Characterization of Tn3000, a transposon responsible for bla<sub>NDM-1</sub> Dissemination among *Enterobacteriaceae* in Brazil, Nepal, Morocco, and India. *Antimicrob Agents Chemother* 59:7387-7395. <https://doi.org/10.1128/AAC.01458-15>.
8. Tenover FC, Arbeit RD, Goering RV, Mickelsen PA, Murray BE, Persing DH, Swaminathan B. 1995. Interpreting chromosomal DNA restriction patterns produced by pulsed-field gelelectrophoresis: criteria for bacterial strain typing. *J Clin Microbiol* 33:2233–2239. <https://jcm.asm.org/content/33/9/2233>.
